# Supplementary material for: Medical Professional Enhancement Using Explainable Artificial Intelligence in Fetal Cardiac Ultrasound Screening
Source: MDPI journal article supplement (doi:10.3390/biomedicines10030551), 2022-02-25
Supplement: s1 [file s1]

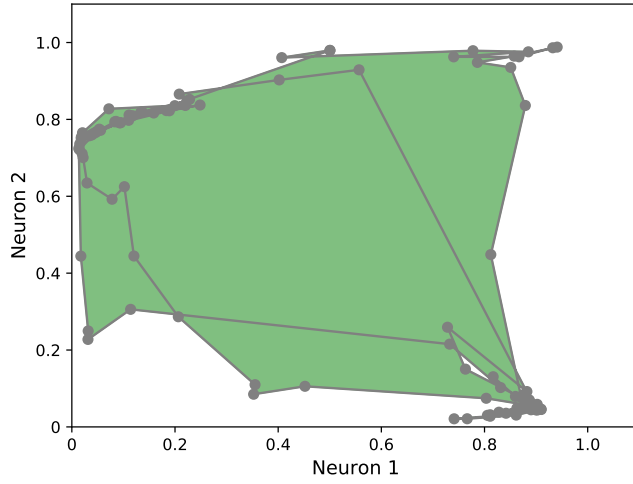

(a) Normal

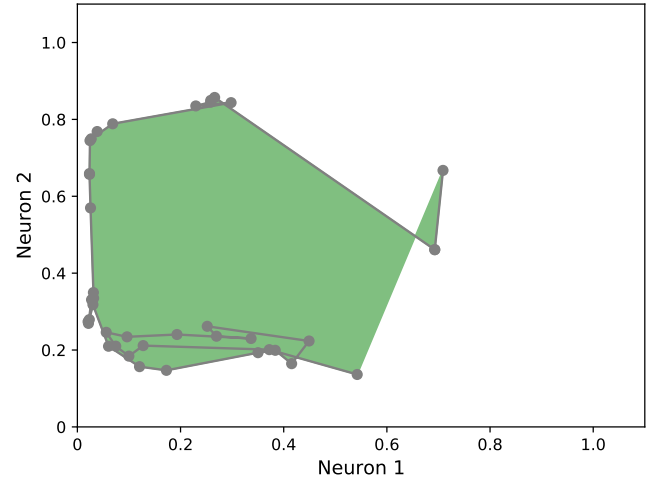

(b) Tetralogy of Fallot

**Supplementary Figure S1.** Shapes created from the main-graph chart diagrams. The green semitransparent areas represent the shapes detected using the Shapely package in Python for the graph chart diagram corresponding to Fig. 3 of the main script. The dots circled in gray correspond to each kernel, and they are connected as the kernel moves as shown in Fig. 3 in the main text. If the start and end points are not closed, similar to the tetralogy of Fallot, they are automatically connected by the library. The abnormality score  $\Gamma_{AI}(G)$  for normal cases is 0.056 (a), and that of  $\Gamma_{AI}(G)$  for the tetralogy of Fallot is 0.729 (b). Figure 3 and the abnormality score are shown to the examiner; however, the shape figures are not shown.

**Supplementary Table S1.** Cases of congenital heart disease and the gestational week at the time of acquisition.

| Congenital heart disease (CHD) | Gestational week |
|--------------------------------|------------------|
| Validation dataset             |                  |
| AVSD                           | 19               |
| DORV-AVSD                      | 21               |
| AoCo-VSD                       | 29               |
| Test dataset                   |                  |
| TGA1                           | 19               |
| TGA1                           | 19               |
| TA                             | 20               |
| Ebstein                        | 21               |
| TOF                            | 21               |
| DORV-TGA-VSD                   | 21               |
| PAIVS                          | 23               |
| RAA                            | 25               |
| HLHS                           | 28               |
| TOF                            | 29               |

AVSD, atrioventricular septal defect; DORV, double-outlet right ventricle; AoCo, coarctation of the aorta; VSD, ventricular septal defect; TGA1, transposition of the great arteries type-1; TA, tricuspid atresia; TOF, tetralogy of Fallot; PAIVS, pulmonary atresia with intact ventricular septum; RAA, right aortic arch; HLHS, hypoplastic left heart syndrome.
