# Supplementary figures and images for: Medical Professional Enhancement Using Explainable Artificial Intelligence in Fetal Cardiac Ultrasound Screening
Source: MDPI journal article supplement (doi:10.3390/biomedicines10030551), 2022-02-25

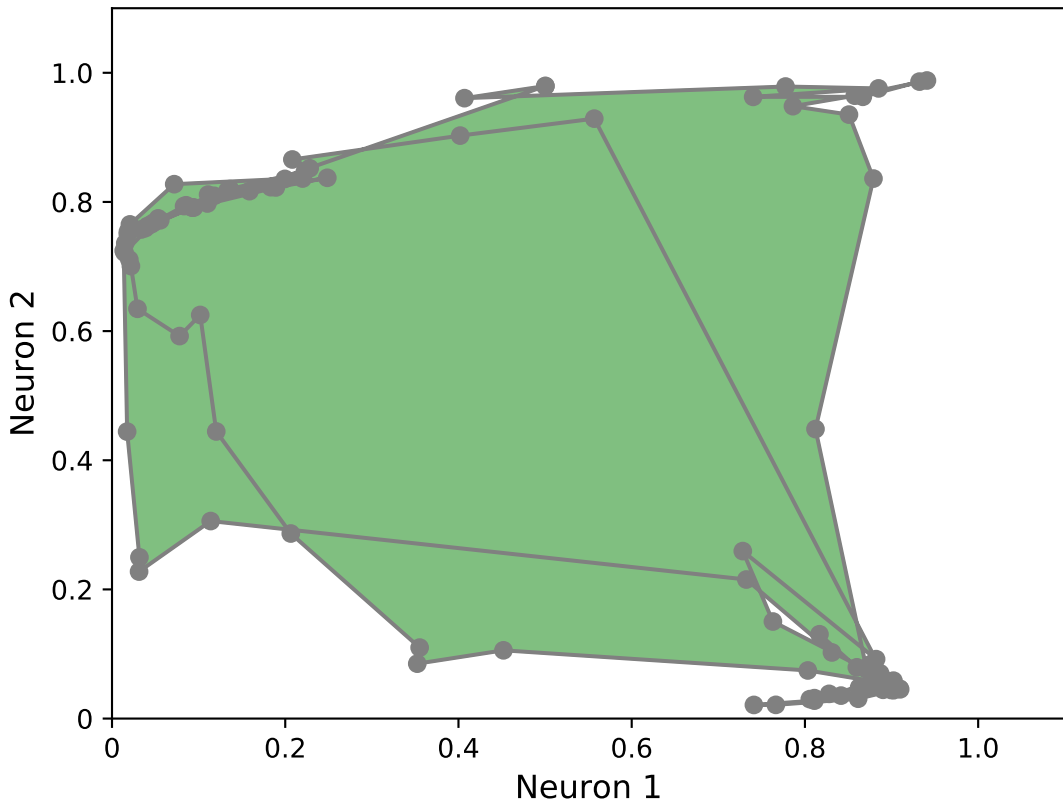

Supplement: s1 [file s1]

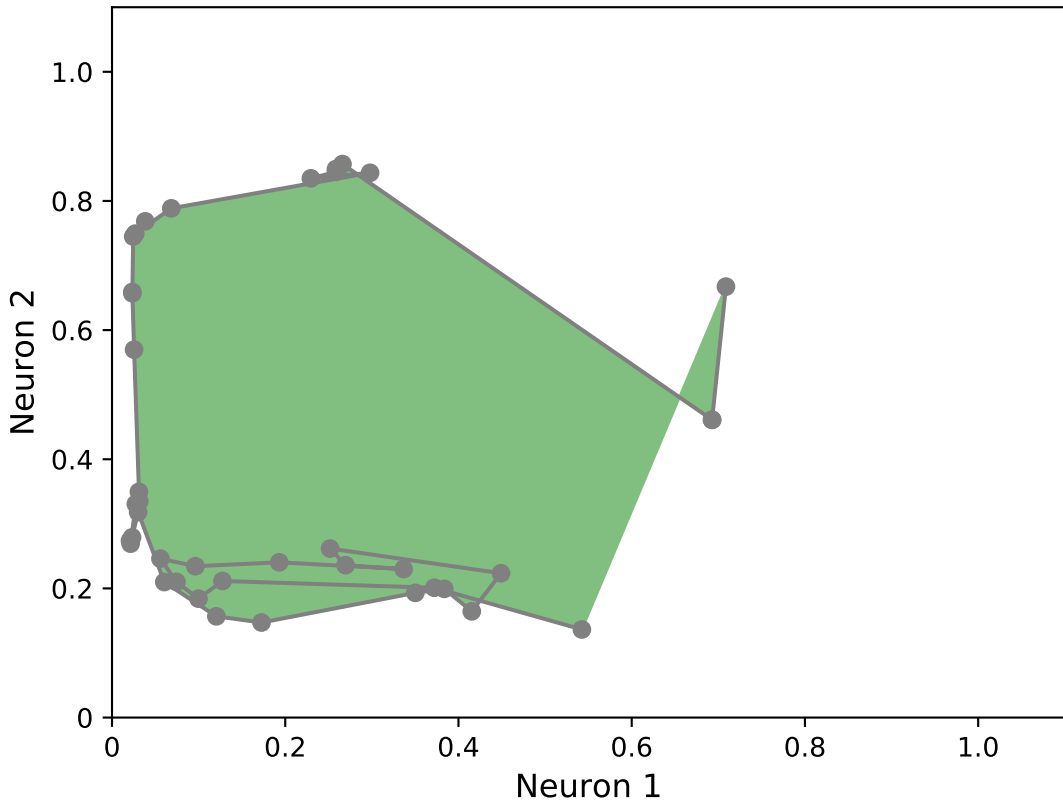

Supplement: s1 [file s1]
